# Supplementary material
Source: publisher site journal article supplement (https://www.dovepress.com/get_supplementary_file.php?f=338851.docx)
Supplement: Supplementary file 1 [file get_supplementary_file.php]

**Supplementary Table 1A.** Assessment of missing FEV1 values

| **Documented Reason for missing Spirometry Values** | **Number**  **N=76** | **Explained by other variables** | **Missing**  **Completely at Random** | **Missing at Random** | **Missing Not at Random** |
| --- | --- | --- | --- | --- | --- |
| Recent lung function testing has been performed or the patient has an upcoming test booked | 32 | Possibly newly diagnosed or suspected to have COPD. Related to prior exacerbation-related variables that have prompted testing to be booked and a referral to the Best Care program. Could be explained by the primary care provider or specialist and clinic | No | Yes | No |
| No reason documented | 20 | Possibly related to the CRE/ clinic that the patient was seen at. There is no reason these patients should be any different from other patients with similar characteristics. | Possible | Possible | No |
| Patient unable to complete the test due to non-respiratory related recent surgery, cognitive impairment, coughing or poor technique | 9 | This could be related to patients with a higher number of co-morbidities and so could be explained by age, BMI, smoking. Or it could be that there is no reason these patients should be any different from other patients with similar characteristics. | Possible | Possible | No |
| Spirometry done but results not recorded or incorrectly entered | 8 | Could be explained by CRE/ clinic. There is potentially no reason these patients should be any different from other patients with similar characteristics. | Possible | Possible | No |
| Not enough time | 4 | Could be related to CRE/ clinic or could be explained by patient characteristics, age, COPD severity etc. | No | Yes | No |
| Patient recovering from an acute COPD exacerbation | 3 | Possibly related to prior exacerbation-related variables and COPD severity (GOLD, CAT score, mMRC) | No | Yes | No |
| **Abbreviations:** CAT, COPD assessment test; CRE certified respiratory educator; FEV1, forced expiratory volume in 1 second; GOLD, Global initiative for chronic Obstructive Lung Disease; HSU, health service utilization; mMRC, Modified Medical Research Council | | | | | |

**Supplementary Table 1B.** Complete case logistic regression for improved quality of life and an absence of urgent health service use.

|  |  | | **CAT score reduction1** | **An absence of HSU2** | |
| --- | --- | --- | --- | --- | --- |
|  |  | | MV  (95% CI) | MV OR  (95% CI) | |
| Total number (N) =495 | | |  |  | |
| *Sex* | Male vs Female | | 1.18 (0.77, 1.81) | 1.15 (0.77, 1.74) | |
| *Age* | ≤60 | | 1 | 1 | |
|  | 61 to 70 | | 1.29 (0.73, 2.27) | 0.77 (0.45, 1.33) | |
|  | 71 to 80 | | 1.54 (0.84, 2.82) | 0.77 (0.43, 1.37) | |
|  | >80 | | 1.61 (0.72, 3.63) | 0.89 (0.40, 1.94) | |
| *Material Deprivation****3*** | 1 |  | 1 | 1 |
|  | 2 |  | 1.06 (0.50, 2.43) | 1.22 (0.56, 2.64) |
|  | 3 |  | 0.64 (0.32, 1.28) | 0.76 (0.38, 1.51) |
|  | 4 |  | 0.90 (0.43, 1.88) | 0.99 (0.47, 2.08) |
|  | 5 |  | 0.88 (0.41, 1.86) | 0.62 (0.28, 1.32) |
| *Instability****3*** | 1 |  | 1 | 1 |
|  | 2 |  | 0.15 (-1.64, 1.94) | 1.52 (0.78, 2.97) |
|  | 3 |  | 0.62 (-1.04, 2.29) | 1.27 (0.68, 2.38) |
|  | 4 |  | 0.30 (-1.54, 2.15) | 0.97 (0.49, 1.92) |
|  | 5 |  | 1.55 (-0.44, 3.55) | 0.59 (0.26, 1.31) |
| *Body Mass Index* | Underweight (<18.5) | | **7.38 (1.89, 28.82)** | 0.82 (0.26, 2.62) | |
|  | Healthy (18.5-24.9) | | 0.97 (0.56, 1.68) | 1.16 (0.68, 1.97) | |
|  | Overweight (25-29.9) | | 1.18 (0.72, 1.94) | 1.43 (0.88, 2.31) | |
|  | Obese (≥30) | | 1 | 1 | |
| *Smoking* | Prior or non-smoker vs current | | 1.57 (0.96, 2.54) | 0.63 (0.40, 1.01) | |
|  | Pack years | | 1.00 (0.99, 1.01) | 1.00 (0.99, 1.01) | |
| *mMRC****4*** | Score ≥2 vs <2 | | **0.61 (0.37, 1.00)** | 1.84 (0.53, 1.34) | |
| *Pre-Bronchodilator FEV1 % Predicted* | 1 *FEV1≥80%* | | 1 | 1 | |
| 2 *50% ≤FEV1<80%* | | 0.66 (0.38, 1.16) | 1.50 (0.86, 2.63) | |
|  | 3 *30%≤FEV1<50%* | | 0.53 (0.28, 1.02) | 0.76 (0.40, 1.43) | |
|  | 4 *FEV1<30%* | | 0.56 (0.18, 1.74) | **0.26 (0.07, 0.92)** | |
| *COPD Assessment Test (0-40) at baseline* | Good QoL (<10) | | **1** | 1 | |
| Moderate QoL (10-19) | | **4.70 (2.52, 8.79)** | 0.63 (0.36, 1.09) | |
|  | Poor QoL (20-40) | | **16.68 (7.97, 34.92)** | 0.60 (0.31, 1.17) | |
| *Exacerbations Prior year* | Antibiotics/Prednisone (Y vs N) | | 0.76 (0.48, 1.20) | **0.44 (0.28, 0.68)** | |
|  | Urgent HSU2 (Y vs N) | | **1.91 (1.13, 3.24)** | 0.82 (0.49, 1.37) | |
| *GOLD group****5*** | A | | 1 | 1 | |
|  | B | | **7.74 (3.83. 15.62)** | 0.70 (0.39, 1.27) | |
|  | C | | 1.58 (0.43, 5.82) | 0.78 (0.25, 2.42) | |
|  | D | | **7.68 (3.50, 16.85)** | **0.27 (0.14, 0.55)** | |
| **Abbreviations:** CAT, COPD assessment test; IDM, integrated disease management; FEV1, forced expiratory volume in 1 second; GOLD, Global initiative for chronic Obstructive Lung Disease; HSU, health service utilization; mMRC, Modified Medical Research Council; MV, multivariable; OR, odds ratio; QoL, quality of life; UV, univariable  **Analyses:** Univariable and multivariable logistic regression. Bold indicates a Wald test p-value <0.05. Continuous variables used in the multivariable logistic regression for age, BMI, CAT, pack years and FEV1, however, for ease of interpretation multivariable-adjusted results are presented categorically.  **Notes:**  **1**Main outcome is a reduction in CAT score ≥ 3 points after 12 (±3) months of IDM  **2**Secondary outcome is an absence of health service use (any of unscheduled physician, walk-in clinic, urgent care, emergency department or hospital admission for COPD) over 12 months of follow-up.  **3** Derived from the Ontario Marginalization Index: Material deprivation measures income, housing quality, education level and family structure and residential instability measures living characteristics, density and types of residential accommodation. 1 represents the least marginalized and 5 represents the most marginalized  **4**A score of 0 indicates little or no effect on breathlessness, 4 indicates a large effect on breathlessness.  **5***GOLD A* 0-1 exacerbations not leading to hospitalization, mMRC 0-1 or CAT <10, *GOLD B* 0-1 exacerbations not leading to hospitalization, mMRC≥2 or CAT≥10, *GOLD C* ≥2 exacerbations or ≥1 exacerbation leading to hospitalization, mMRC 0-1 or CAT <10, *GOLD D* ≥2 exacerbations or ≥1 exacerbation leading to hospitalization, mMRC ≥ 2 or CAT ≥10. | | | | | |

**Supplementary Table 1C.** Complete case mixed effects linear regression to identify predictors associated with change in quality of life.

|  |  | **Change in CAT score1** | | | | |
| --- | --- | --- | --- | --- | --- | --- |
|  | | |  | | MV  β (95% CI) | |
| Total number (N) =495 | | | | |  | |
| *Sex* | | | Male vs Female | | 0.29 (-0.70, 1.28) | |
| *Age* | | | Each year | | -0.04 (-0.09, 0.01) | |
| *Material Deprivation****2*** | | | 1 |  | 0 |
|  | | | 2 |  | 0.61 (-1.17, 2.39) |
|  | | | 3 |  | 0.70 (-0.92, 2.33) |
|  | | | 4 |  | 0.22 (-1.54, 1.98) |
|  | | | 5 |  | 0.50 (-1.33, 2.32) |
| *Instability****2*** | | | 1 |  | 0 |
|  | | | 2 |  | 0.39 (-1.17, 2.00) |
|  | | | 3 |  | 0.92 (-0.92, 2.45) |
|  | | | 4 |  | 0.33 (-1.54, 2.04) |
|  | | | 5 |  | 1.13 (-1.33, 3.07) |
| *Body Mass Index* | | | Each (kg/m3) | | 0.04 (-0.03, 0.11) | |
| *Smoking* | | | Prior or non-smoker vs current | | -0.55 (-1.66, 0.55) | |
|  | | | Pack years | | -0.01 (-0.02, 0.01) | |
| *mMRC****3*** | | | Score ≥2 vs <2 | | **2.18 (1.03, 3.32)** | |
| *Pre-Bronchodilator FEV1 % Predicted* | | | Each % predicted | | **-0.03 (-0.05, -0.00)** | |
| *COPD Assessment Test (0-40) at baseline* | | | Each CAT score point | | **-0.56 (-0.63, -0.48)** | |
| *Exacerbations Prior year* | | | Antibiotics/Prednisone (Y vs N) | | 1.07 (-0.02, 1.15) | |
|  | | | Urgent HSU2 (Y vs N) | | -0.69 (-1.90, -0.53) | |
| *GOLD group****4*** | | | A | | 0 | |
|  | | | B | | **-4.72 (-6.26. -3.17)** | |
|  | | | C | | 2.71 (-0.35, 5.78) | |
|  | | | D | | **-4.75 (-6.62, -2.88)** | |
| **Abbreviations:** CAT, COPD assessment test; IDM, integrated disease management; FEV1, forced expiratory volume in 1 second; GOLD, Global initiative for chronic Obstructive Lung Disease; HSU, health service utilization; mMRC, Modified Medical Research Council; MV, multivariable; OR, odds ratio; QoL, quality of life, VS versus  **Analyses:** Multivariable linear regression using a mixed effects model with clinic as a random effect. Bold indicates a p-value <0.05. Continuous variables used in the multivariable logistic regression for age, BMI, smoking pack years, CAT and FEV1.  **Notes:**  **1**Main outcome is the change in CAT score from baseline after 12 (±3) months of IDM. The 12 month value minus baseline value and therefore a negative change is an improvement in QoL.  **2** Derived from the Ontario Marginalization Index: Material deprivation measures income, housing quality, education level and family structure and residential instability measures living characteristics, density and types of residential accommodation. 1 represents the least marginalized and 5 represents the most marginalized  **3**A score of 0 indicates little or no effect on breathlessness, 4 indicates a large effect on breathlessness.  **4***GOLD A* 0-1 exacerbations not leading to hospitalization, mMRC 0-1 or CAT <10, *GOLD B* 0-1 exacerbations not leading to hospitalization, mMRC≥2 or CAT≥10, *GOLD C* ≥2 exacerbations or ≥1 exacerbation leading to hospitalization, mMRC 0-1 or CAT <10, *GOLD D* ≥2 exacerbations or ≥1 exacerbation leading to hospitalization, mMRC ≥ 2 or CAT ≥10. | | | | | | |

**Supplementary Table 2.** Univariable and multivariable analysis of baseline factors associated with change in COPD assessment test score following 12 (±3) months of integrated disease management (IDM) using linear regression modelling

|  |  | **Change in CAT score1** | | | | |
| --- | --- | --- | --- | --- | --- | --- |
|  | | |  | | UV  β (95% CI) | MV  β (95% CI) |
| Total number (N) =571 | | | | |  |  |
| *Sex* | | | Male vs Female | | 0.58 (-0.50, 1.66) | 0.45 (-0.45, 1.36) |
| *Age* | | | Each year | | -0.05 (-0.01, 0.004) | -0.03 (-0.08, 0.02) |
| *Material Deprivation****2*** | | | 1 |  | 0 | 0 |
| 2 |  | -0.81 (-2.72, 1.10) | 0.34 (-1.26, 1.94) |
|  | | | 3 |  | -0.11 (-1.84, 1.62) | 0.69 (-0.80, 2.18) |
|  | | | 4 |  | -0.31 (-2.16, 1.53) | -0.20 (-1.81, 1.42) |
|  | | | 5 |  | 0.22 (-1.49, 1.93) | 0.33 (-1.34, 1.99) |
| *Instability****2*** | | | 1 |  | 0 | 0 |
|  | | | 2 |  | 0.15 (-1.64, 1.94) | 0.12 (-1.76, 2.02) |
|  | | | 3 |  | 0.62 (-1.04, 2.29) | 0.72 (-0.54, 1.99) |
|  | | | 4 |  | 0.30 (-1.54, 2.15) | 0.42 (-1.26, 2.05) |
|  | | | 5 |  | 1.55 (-0.44, 3.55) | 1.58 (-0.29, 3.37) |
| *Body Mass Index* | | | Each (kg/m3) | | -0.03 (-0.12, 0.05) | 0.02 (-0.05, 0.09) |
| *Smoking* | | | Prior or non-smoker vs current | | -0.24 (-1.38, 0.90) | -0.74 (-1.98, 0.50) |
|  | | | Pack years | | 0.00 (-0.02, 0.02) | -0.01 (-0.03, 0.08) |
| *mMRC****3*** | | | Score ≥2 vs <2 | | **-1.22 (-2.30, -0.14)** | **2.27 (1.22, 3.33)** |
| *Pre-Bronchodilator FEV1 % Predicted* | | | Each % predicted  *Imputed n=76* | | -0.00 (-0.03, 0.03) | -**0.03 (-0.06, -0.01)** |
| *COPD Assessment Test (0-40) at baseline* | | | Each CAT score point | | **-0.44 (-0.50, -0.38)** | **-0.56 (-0.63, -0.49)** |
| *Exacerbations Prior year* | | | Antibiotics/Prednisone (Y vs N) | | -0.40 (-1.48, 0.68) | **1.01 (0.01, 2.02)** |
|  | | | Urgent HSU2 (Y vs N) | | **-1.76 (-2.95, -0.57)** | -0.51 (-1.63, 0.60) |
| *GOLD group****4*** | | | A | | 0 | 0 |
|  | | | B | | **-4.32 (-5.72. -2.93)** | **-4.77 (-6.22, -3.31)** |
|  | | | C | | 2.99 (0.17, 5.81) | **2.82 (0.03, 5.61)** |
|  | | | D | | **-4.09 (-5.67, -2.51)** | **-4.61 (-6.34, -2.87)** |
| **Abbreviations:** CAT, COPD assessment test; IDM, integrated disease management; FEV1, forced expiratory volume in 1 second; GOLD, Global initiative for chronic Obstructive Lung Disease; HSU, health service utilization; mMRC, Modified Medical Research Council; MV, multivariable; OR, odds ratio; QoL, quality of life; UV, univariable, VS versus  **Analyses:** Univariable linear regression and multivariable linear regression using a mixed effects model with clinic as a random effect. Bold indicates a p-value <0.05. Continuous variables used in the multivariable logistic regression for age, BMI, smoking pack years, CAT and FEV1.  **Notes:**  **1**Main outcome is the change in CAT score from baseline after 12 (±3) months of IDM. The 12 month value minus baseline value and therefore a negative change is an improvement in QoL.  **2** Derived from the Ontario Marginalization Index: Material deprivation measures income, housing quality, education level and family structure and residential instability measures living characteristics, density and types of residential accommodation. 1 represents the least marginalized and 5 represents the most marginalized  **3**A score of 0 indicates little or no effect on breathlessness, 4 indicates a large effect on breathlessness.  **4***GOLD A* 0-1 exacerbations not leading to hospitalization, mMRC 0-1 or CAT <10, *GOLD B* 0-1 exacerbations not leading to hospitalization, mMRC≥2 or CAT≥10, *GOLD C* ≥2 exacerbations or ≥1 exacerbation leading to hospitalization, mMRC 0-1 or CAT <10, *GOLD D* ≥2 exacerbations or ≥1 exacerbation leading to hospitalization, mMRC ≥ 2 or CAT ≥10. | | | | | | |

**Supplementary Table 3**. Baseline demographical and clinical characteristics for individuals completing 12 (±3) months of integrated disease management (IDM) and patients lost to follow-up (only attending an initial visit).

|  |  | **Individuals Completing**  **12 (±3) months IDM** | **Lost to Follow-up.**  Initial appointment only | |
| --- | --- | --- | --- | --- |
| Total number (N) |  | 868 | 636 | |
| **Demographics** |  |  |  | |
| Sex | *Female* | 404 (47%) | 377 (59%) | |
|  | *Male* | 464 (53%) | 259 (41%) | |
| Age | *≤60* | 188 (22%) | 235 (37%) | |
|  | *61 to 70* | 286 (34%) | 183 (29%) | |
|  | *71 to 80* | 300 (35%) | 145 (23%) | |
|  | *>80* | 94 (11%) | 73 (11%) | |
|  | *Mean (SD)* | 67.9 (9.6) | 64.8 | |
| Ethnicity | *Caucasian* | 850 (98%) | 625 (98%) | |
| Dwelling | *Rural* | 310 (36%) | 190 (30%) | |
|  | *Urban* | 558 (64%) | 446 (70%) | |
| Current Occupation | *Retired* | 634 (73%) | 365 (57%) | |
| **Clinical Characteristics** | |  |  | |
| Body Mass Index (kg/m2) | *Underweight (<18.5)* | 25 (3%) | 17 (3%) | |
| *Healthy (18.5-24.9)* | 192 (22%) | 167 (26%) | |
|  | *Overweight (25-29.9)* | 272 (31%) | 188 (30%) | |
|  | *Obese (≥30)* | 379 (44%) | 264 (42%) | |
|  | *Mean (SD)* | 29.6 (6.9) | 29.4 (7.0) | |
| Physical Activity | *Affected by COPD prior year* | 422 (49%) | 266 (42%) | |
| Family History | *COPD, Chronic Bronchitis, Emphysema* | 307 (35%) | 216 (34%) | |
| Smoking | *Current smoker* | 278 (32%) | 330 (52%) | |
|  | *Pack Years mean (SD)* | 47.5 (28.0) | 36.0 (26.8) | |
| mMRC1 | *(range 0-4) mean (SD)* | 1.4 (1.0) | 1.3 (1.0) | |
| COPD Assessment Test (0-40) | *Good HR-QoL(<10)* | 174 (20%) | 131 (29%) | |
| *Moderate HR-QoL(10-19)* | 320 (37%) | 171 (38%) | |
|  | *Poor HR-QoL (20-29)* | 174 (20%) | 123 (27%) | |
|  | *Very poor HR-QoL(≥30)* | 34 (4%) m166 (19%) | 24 (5%) m 187 | |
|  | *Mean (SD)* | 15.4 (7.9) | 15.5 (8.3) | |
| GOLD group2 | *A* | 139 (16%) | 110 (25%) | |
|  | *B* | 360 (41%) | 219 (49%) | |
|  | *C* | 35 (4%) | 21 (5%) | |
|  | *D* | 168 (19%) m166 (19%) | 99 (22%) m 187 | |
| FEV1 pre-bronchodilator  *mean (SD)* | *Measured (litres)* | 1.7 (0.7) | 1.9 (0.7) | |
| *% predicted* | 63.9 (20.9) m110 (13%) | 62.4 (20.4) m 91(14%) | |
| FEV1 post-bronchodilator  *mean (SD)* | *Measured (litres)* | 1.9 (0.7) | 1.9 (0.7) | |
| *% predicted* | 68.3 (20.0) m246(28%) | 72.8 (21.0) m 225 (35%) | |
| Exacerbations prior year | *Antibiotics/Prednisone* | 397 (54%) | 244 (38%) | |
| *HSU3* | 625 (72%) | 370 (58%) | |
| *Mean HSU (SD)* | 1.8 (2.3) | 1.5 (2.1) | |
| *IDM* integrated disease management, *RCT* randomised control trial, *MRC* Medical Research Council, *FEV1* forced expiratory volume in 1 second, *FVC* forced vital capacity, *COPD* chronic obstructive pulmonary disease, *HR-QoL* health related quality of life, *CAT* COPD assessment test, *GOLD* Global initiative for chronic Obstructive Lung Disease *HSU h*ealth service utilization, *m* missing data.  Data presented as frequency (%) unless otherwise stated.  1A score of 0 indicates little or no effect on breathlessness, 4 indicates a large effect on breathlessness.  *2GOLD A* 0-1 exacerbations not leading to hospitalization, mMRC 0-1 or CAT <10, *GOLD B* 0-1 exacerbations not leading to hospitalization, mMRC≥2 or CAT≥10, *GOLD C* ≥2 exacerbations or ≥1 exacerbation leading to hospitalization, mMRC 0-1 or CAT <10, *GOLD D* ≥2 exacerbations or ≥1 exacerbation leading to hospitalization, mMRC ≥ or CAT ≥10.  3Any of unscheduled physician, walk-in clinic, urgent care, emergency department or hospital admission for COPD | | | |
